# Supplementary material for: Adsorptive removal of aflatoxin B 1 from water and edible oil by dopamine-grafted biomass chitosan–iron–cobalt spinel oxide nanocomposite: mechanism, kinetics, equilibrium, thermodynamics, and oil quality
Source: Royal Society of Chemistry journal article supplement (doi:10.1039/d3ra06495f), 2023-01-01
Supplement: d3ra06495f1.pdf [file d3ra06495f1.pdf]

Electronic Supplementary Material (ESI) for RSC Advances.

## Supplementary data

# Adsorptive removal of Aflatoxin B<sub>1</sub> from Water and Edible Oil by Dopamine-Grafted Biomass Chitosan-Iron-Cobalt Spinel Oxides Nanocomposite : Mechanism, Kinetic, Equilibrium, Thermodynamics, and Oil Quality

N.Abasi<sup>a</sup>, A.R.Faraji<sup>b,c,\*</sup>, A. Davood<sup>a</sup>

<sup>a</sup>Department of Medicinal Chemistry, Faculty of Pharmaceutical, Tehran Medical Sciences, Islamic Azad University, Tehran, Iran.

<sup>b</sup>Department of Organic Chemistry, Faculty of Pharmaceutical Chemistry, Tehran Medical Sciences, Islamic Azad University, Tehran, Iran.

<sup>c</sup>Nutrition and Food Sciences Research Center, Tehran Medical Sciences, Islamic Azad University, Tehran, Iran.

**Text S1.** *Characterization instruments*

The surface and pore size of adsorbents were investigated by SEM (Transmission Electron Microscopy, Tecnai F30TEM operating at 300 Kv), and TEM (Transmission Electron Microscopy, Philips 501 microscope ,80 kV voltage). The XRD patterns were recorded on a powder X-ray diffractometer (X-Ray Diffraction, Bruker D8 Advance diffractometer, CuKa radiation, 40 Kv, 20 miliamper, Time Per Step=1 s; scan step 0.05°; 2θ from 10 to 70). Fourier-Transform Infrared, (Shimadzu Varian 4300Fourier Transform Infrared spectrometer, KBr pellets) was used to collect the FT-IR spectra of DC/CFSO NCwith potassium bromide pellets. The DLS (Dynamic Light Scattering, (DLS, Zetasizer Nano-ZS-90 (ZEN 3600, Malvern Instrument) provided direct visualization of the size of the DC/CFSO NCNPs. A vibrating sample magnetometry (Vibrating-Sample Magnetometer, BHV-55 VSM) was employed to assess magneticproperties of samples. Thermal stability of samples was assessed by TGA (Thermogravimetric Analysis, Perkin-Elmer TG-DTA 6300, heating rate of 15 °C/min).

## Text 2S. Safety precautions

Protective masks, eye protection, gloves, and clothing were worn as safety precautions while working with AFB<sub>1</sub> stock solutions and executing the related investigation. The AFB<sub>1</sub> solution should be kept in a well-ventilated place and all the tests performed under the standard hood. Also, the hands and face after working with substance should be washed carefully. The whole of the glass instruments were immersed and decontaminated in a NaClO (aq) for 24 h, washed with liquid detergent and distilled water, and dried at oven at 50 °C for next experiment.

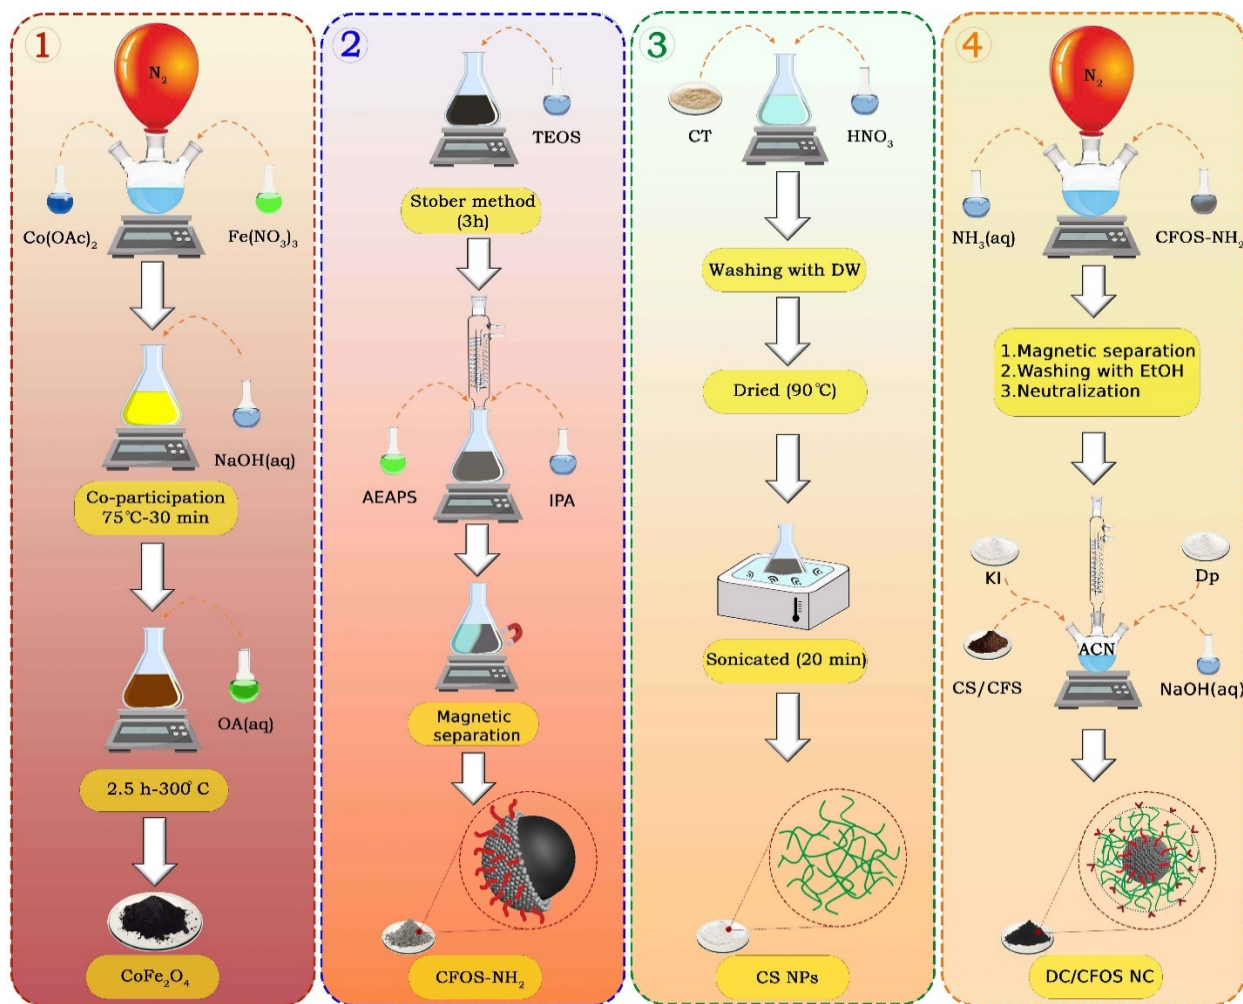

**Fig 1S.** Schematic present of preparation of DC/CFSO NPs in detail.

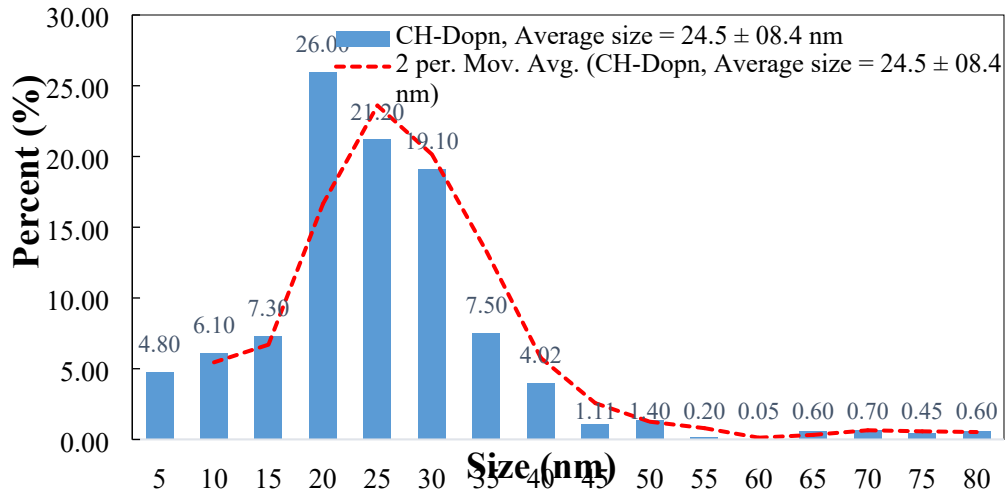

**Fig 2S.** DLS diagram of prepared Mt-CS/CFS NS.

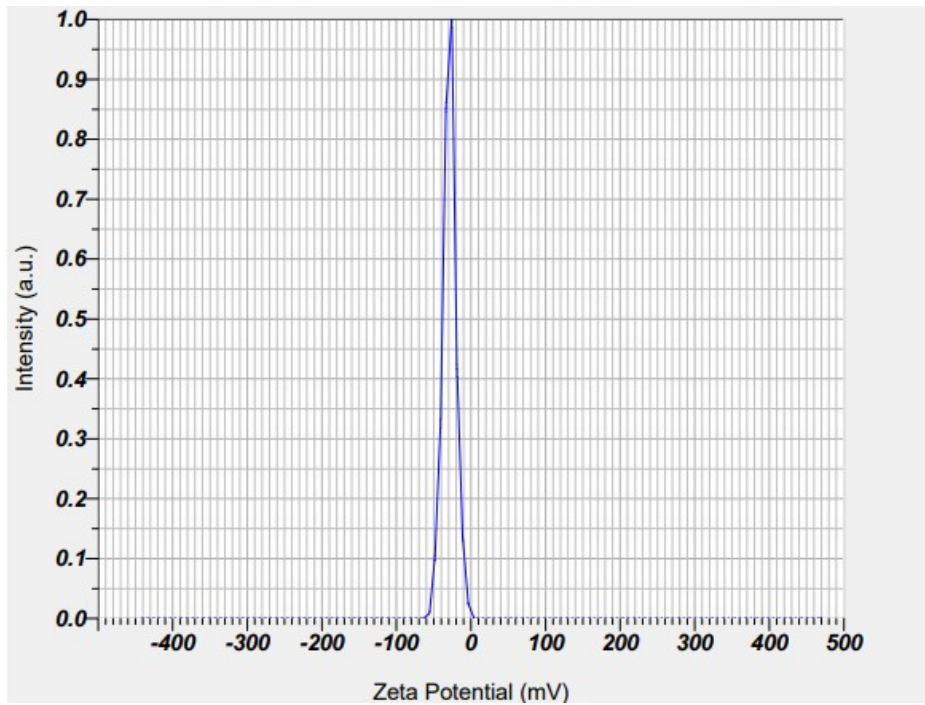

**Fig 3S.**  $\zeta$ -potential of prepared Mt-CS/CFS NS.

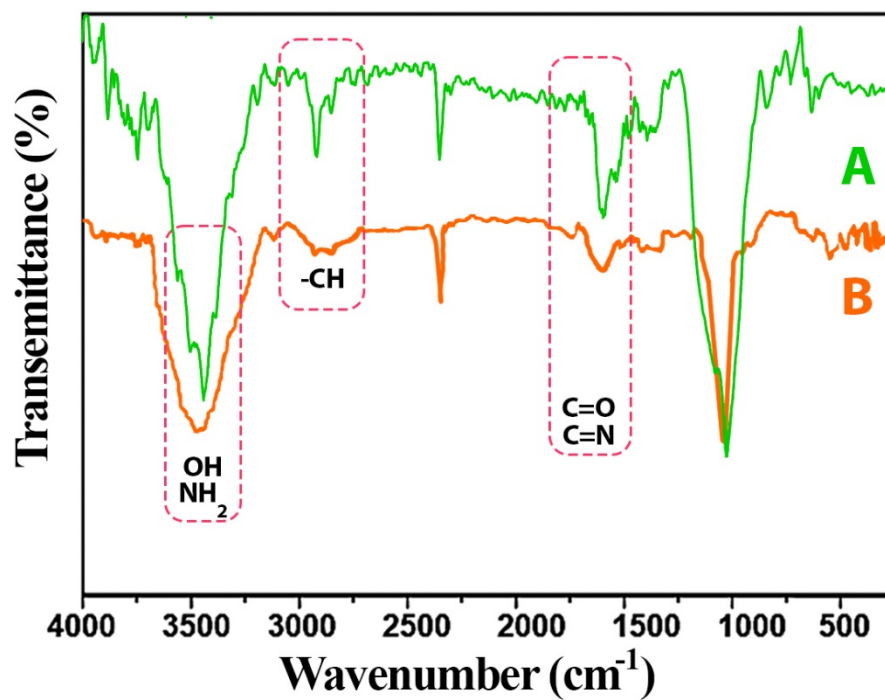

**Fig.4S.** FTIR spectra of (A) fresh DC/CFOS NC and (B) acid-treated DC/CFOS NC.

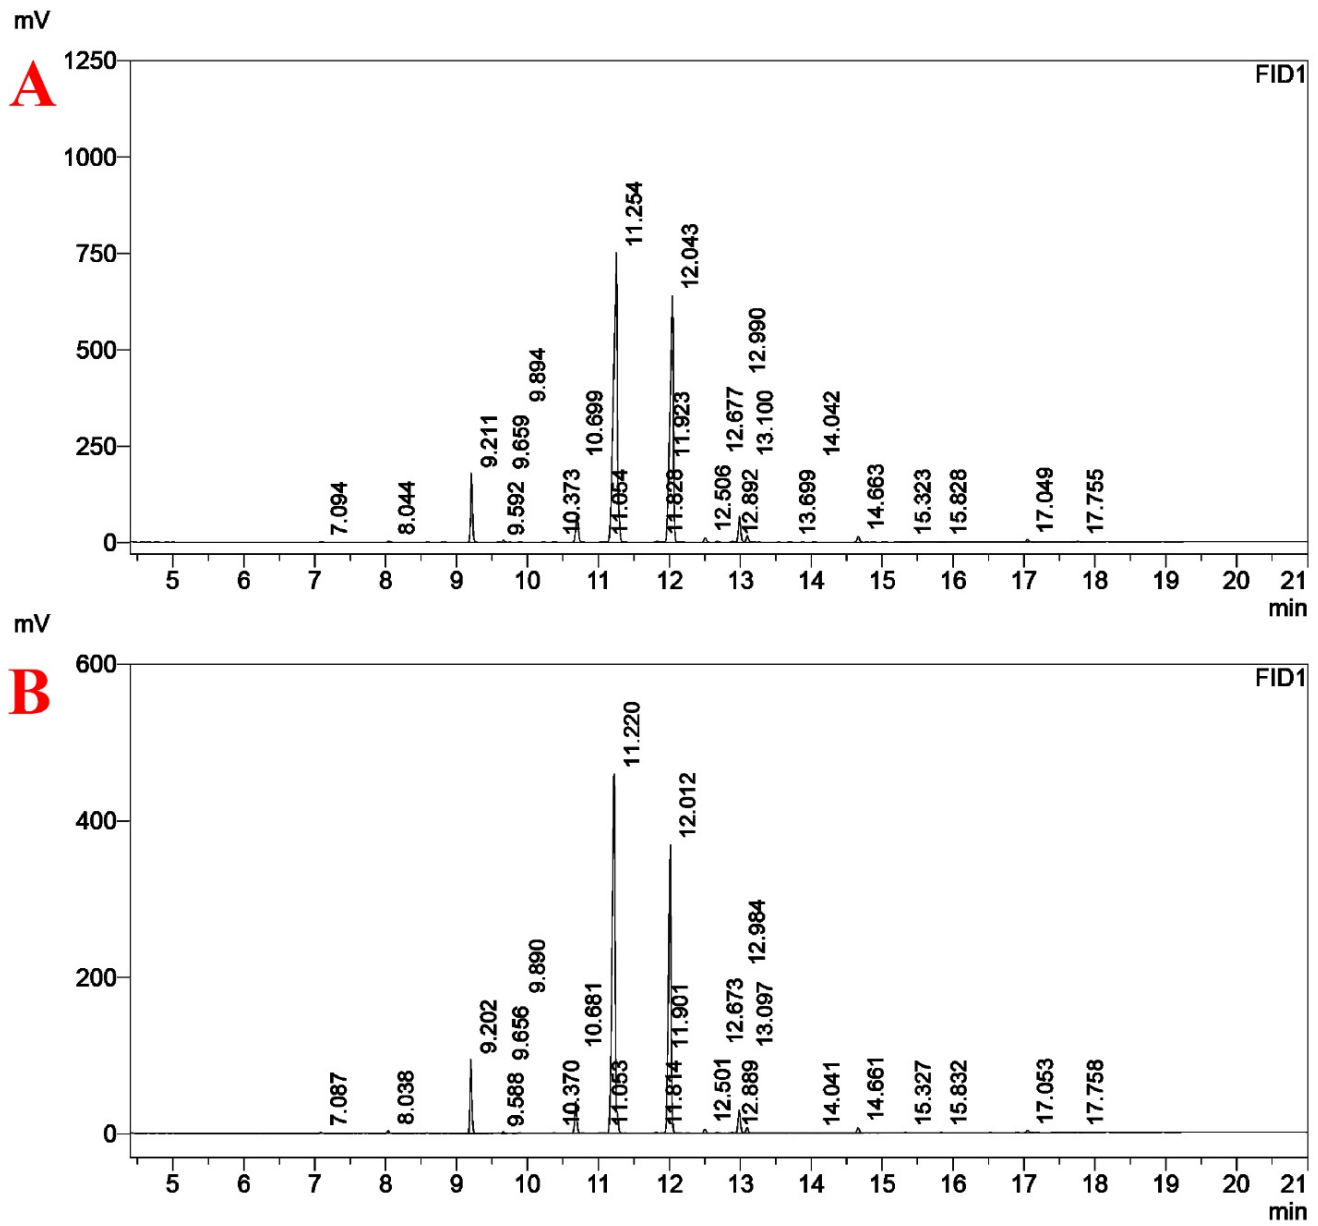

Fig.5S. GC analysis of edible oil before and after adsorption.

**Table 1S.** A number of major characteristics of aflatoxin B<sub>1</sub>.

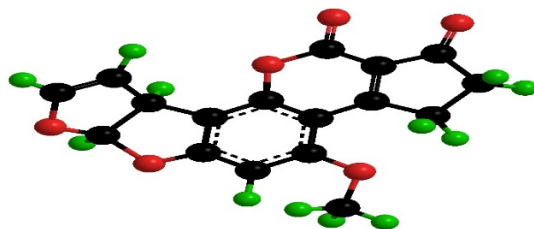

| Parameter                      | Comments                                                                                                                                                                                                                                                                                                                                           |
|--------------------------------|----------------------------------------------------------------------------------------------------------------------------------------------------------------------------------------------------------------------------------------------------------------------------------------------------------------------------------------------------|
| Molecular formula              | <ul style="list-style-type: none"> <li>• C<sub>17</sub>H<sub>12</sub>O<sub>6</sub></li> </ul>                                                                                                                                                                                                                                                      |
| Molar mass                     | <ul style="list-style-type: none"> <li>• 312.06 g.mol<sup>-1</sup></li> </ul>                                                                                                                                                                                                                                                                      |
| IUPAC name                     | <ul style="list-style-type: none"> <li>• 4-methoxy-2,3,6a,9a-tetrahydrocyclopenta[c]furo[3',2':4,5]furo[2,3-h]chromene-1,11-dione</li> </ul>                                                                                                                                                                                                       |
| Melting point                  | <ul style="list-style-type: none"> <li>• 653.59 K</li> </ul>                                                                                                                                                                                                                                                                                       |
| Boiling point                  | <ul style="list-style-type: none"> <li>• 877.83 K</li> </ul>                                                                                                                                                                                                                                                                                       |
| Wavelength (λ <sub>max</sub> ) | <ul style="list-style-type: none"> <li>• 364 nm</li> </ul>                                                                                                                                                                                                                                                                                         |
| CAS number                     | <ul style="list-style-type: none"> <li>• 1162-65-8</li> </ul>                                                                                                                                                                                                                                                                                      |
| Physical state                 | <ul style="list-style-type: none"> <li>• Solid / Powder</li> </ul>                                                                                                                                                                                                                                                                                 |
| Color                          | <ul style="list-style-type: none"> <li>• White</li> </ul>                                                                                                                                                                                                                                                                                          |
| Classification                 | <ul style="list-style-type: none"> <li>• Carcinogenic mycotoxins</li> </ul>                                                                                                                                                                                                                                                                        |
| Produced by                    | <ul style="list-style-type: none"> <li>• Aspergillus flavus and Aspergillus parasiticus</li> </ul>                                                                                                                                                                                                                                                 |
| Acute toxicity                 | <ul style="list-style-type: none"> <li>• Oral, rat; LD<sub>50</sub>: 6.0 mg.kg<sup>-1</sup></li> <li>• Oral, mouse; LD<sub>50</sub>: 9.0 mg.kg<sup>-1</sup></li> <li>• Oral, monkey; LD<sub>50</sub>: 2.2 mg.kg<sup>-1</sup></li> </ul>                                                                                                            |
| Adverse effects                | <ul style="list-style-type: none"> <li>• Carcinogenicity</li> <li>• Damage to the epithelium</li> <li>• Inflammation</li> <li>• Reduction of nutrient absorption (malnutrition)</li> <li>• Reduction of bone/tissue growth</li> <li>• Hepatotoxicity</li> <li>• Reproductive toxicity/ Teratogenicity</li> <li>• Germ cell mutagenicity</li> </ul> |

**Table 2S.** ANOVA for RSM quadratic model.

| <b>ANOVA for Response Surface Quadratic Model</b> |                       |           |                    |                |                            |             |
|---------------------------------------------------|-----------------------|-----------|--------------------|----------------|----------------------------|-------------|
| <b>Analysis of variance table</b>                 |                       |           |                    |                |                            |             |
| <b>Source</b>                                     | <b>Sum of Squares</b> | <b>df</b> | <b>Mean Square</b> | <b>F Value</b> | <b>p-value Prob &gt; F</b> |             |
| Model                                             | 5059.25               | 14        | 361.37             | 10.54          | < 0.0001                   | significant |
| <i>A-Temperatu</i>                                | 4.92                  | 1         | 4.92               | 0.14           | 0.7106                     |             |
| <i>B-Time</i>                                     | 792.80                | 1         | 792.80             | 23.12          | 0.0003                     |             |
| <i>C-[AFB1]</i>                                   | 940.43                | 1         | 940.43             | 27.43          | 0.0001                     |             |
| <i>D-[DC/CFOS</i>                                 | 1960.74               | 1         | 1960.74            | 57.19          | < 0.0001                   |             |
| <i>AB</i>                                         | 16.81                 | 1         | 16.81              | 0.49           | 0.4953                     |             |
| <i>AC</i>                                         | 118.81                | 1         | 118.81             | 3.47           | 0.0838                     |             |
| <i>AD</i>                                         | 7.02                  | 1         | 7.02               | 0.20           | 0.6578                     |             |
| <i>BC</i>                                         | 1.10                  | 1         | 1.10               | 0.032          | 0.8603                     |             |
| <i>BD</i>                                         | 254.40                | 1         | 254.40             | 7.42           | 0.0165                     |             |
| <i>CD</i>                                         | 118.81                | 1         | 118.81             | 3.47           | 0.0838                     |             |
| <i>A<sup>2</sup></i>                              | 253.24                | 1         | 253.24             | 7.39           | 0.0167                     |             |
| <i>B<sup>2</sup></i>                              | 9.91                  | 1         | 9.91               | 0.29           | 0.5993                     |             |
| <i>C<sup>2</sup></i>                              | 16.12                 | 1         | 16.12              | 0.47           | 0.5041                     |             |
| <i>D<sup>2</sup></i>                              | 709.81                | 1         | 709.81             | 20.70          | 0.0005                     |             |
| Residual                                          | 480.01                | 14        | 34.29              |                |                            |             |
| <i>Lack of Fit</i>                                | 478.48                | 10        | 47.85              | 125.26         | 0.0002                     |             |
| <i>Pure Error</i>                                 | 1.53                  | 4         | 0.38               |                |                            |             |
| Cor Total                                         | 5539.26               | 28        |                    |                |                            |             |



**Table.3S.** Screening data of various adsorbent.

| Absorbent system                                                     | Sample        | $Q_{\max}$<br>( $\text{mg}\cdot\text{g}^{-1}$ ) | Removal<br>(%) | Comments                                                                                                                                                                                  | [Ref] |
|----------------------------------------------------------------------|---------------|-------------------------------------------------|----------------|-------------------------------------------------------------------------------------------------------------------------------------------------------------------------------------------|-------|
| Cu-BTC MOF-derived porous carbonaceous materials [30.0 mg]           | Vegetable oil | 16.67                                           | 90.0           | <ul style="list-style-type: none"> <li>• T: 25.0 °C</li> <li>• t: 30 min</li> <li>• [AFB<sub>1</sub>]: 5.0 <math>\mu\text{g}\cdot\text{mL}^{-1}</math></li> </ul>                         | [1]   |
| 1.5NZMT <sup>1</sup> [3.0 mg]                                        | Water         | 4.87                                            | ~80.0          | <ul style="list-style-type: none"> <li>• T: 37.0 °C</li> <li>• t: 120 min</li> <li>• [AFB<sub>1</sub>]: 3.300 <math>\text{mg}\cdot\text{L}^{-1}</math></li> </ul>                         | [2]   |
| 0.5OP-10Mt <sup>2</sup> [0.01 g]                                     | Water         | 2.78                                            | 58.73          | <ul style="list-style-type: none"> <li>• pH: 3.5</li> <li>• T: 37.0 °C</li> <li>• [AFB<sub>1</sub>]: 4.0 <math>\text{mg}\cdot\text{L}^{-1}</math></li> </ul>                              | [3]   |
| 1.0OP-10Mt [0.01 g]                                                  | Water         | 2.69                                            | 49.73          | <ul style="list-style-type: none"> <li>• pH: 3.5</li> <li>• T: 37.0 °C</li> <li>• [AFB<sub>1</sub>]: 4.0 <math>\text{mg}\cdot\text{L}^{-1}</math></li> </ul>                              | [3]   |
| 2.0OP-10Mt [0.01 g]                                                  | Water         | 2.72                                            | 53.74          | <ul style="list-style-type: none"> <li>• pH: 3.5</li> <li>• T: 37.0 °C</li> <li>• [AFB<sub>1</sub>]: 4.0 <math>\text{mg}\cdot\text{L}^{-1}</math></li> </ul>                              | [3]   |
| PDA/PEI-coated membranes <sup>3</sup>                                | Apple juice   | -                                               | 71.10          | <ul style="list-style-type: none"> <li>• pH: 5.2</li> <li>• [AFB<sub>1</sub>]: 100 <math>\mu\text{g}\cdot\text{kg}^{-1}</math></li> </ul>                                                 | [4]   |
| 0.45SDB <sup>4</sup> -6-K-9@Fe <sub>3</sub> O <sub>4</sub> [50.0 mg] | Peanut oil    | 0.1354                                          | ~70.0          | <ul style="list-style-type: none"> <li>• T: 65.0 °C</li> <li>• t: 120 min</li> <li>• [AFB<sub>1</sub>]: 200 <math>\text{ng}\cdot\text{mL}^{-1}</math></li> </ul>                          | [5]   |
| MMS <sup>5</sup> [0.1 g]                                             | Water         | 1118.69<br>$\mu\text{g}\cdot\text{g}^{-1}$      | 94.59          | <ul style="list-style-type: none"> <li>• pH: 11.0</li> <li>• T: 20.0 °C</li> <li>• t: 120 min</li> <li>• [AFB<sub>1</sub>]: 0.2 <math>\mu\text{g}\cdot\text{mL}^{-1}</math></li> </ul>    | [6]   |
| FNHMS <sup>6</sup> -0.4 [10.0 mg]                                    | Water         | 27.34                                           | ~100           | <ul style="list-style-type: none"> <li>• pH: 7.0</li> <li>• T: 37.0 °C</li> <li>• t: 240 min</li> <li>• [AFB<sub>1</sub>]: 4.0 <math>\text{mg}\cdot\text{L}^{-1}</math></li> </ul>        | [7]   |
| MCSC <sup>7</sup> -10 [0.2 $\text{mg}\cdot\text{mL}^{-1}$ ]          | Water         | 24.99                                           | >95.0          | <ul style="list-style-type: none"> <li>• pH: 7.0</li> <li>• T: 25.0 °C</li> <li>• t: 240 min</li> <li>• [AFB<sub>1</sub>]: 20.0 <math>\text{mg}\cdot\text{L}^{-1}</math></li> </ul>       | [8]   |
| Activated carbon [0.5 $\text{mg}\cdot\text{mL}^{-1}$ ]               | Water         | 20.00                                           | >99.0          | <ul style="list-style-type: none"> <li>• pH: 7.0</li> <li>• T: 37.0 °C</li> <li>• t: 60 min</li> <li>• [AFB<sub>1</sub>]: 20.0 <math>\text{mg}\cdot\text{mL}^{-1}</math></li> </ul>       | [9]   |
| Banana peel [6.0 $\text{mg}\cdot\text{mL}^{-1}$ ]                    | Water         | 8.40                                            | 94.9±0.4       | <ul style="list-style-type: none"> <li>• pH: 7.0-8.0</li> <li>• T: 22.0 °C</li> <li>• t: 18 min</li> <li>• [AFB<sub>1</sub>]: 20.0 <math>\mu\text{g}\cdot\text{mL}^{-1}</math></li> </ul> | [10]  |
| Durian peel [5.0 $\text{mg}\cdot\text{mL}^{-1}$ ]                    | Water         | 13.02                                           | 98.40          | <ul style="list-style-type: none"> <li>• pH: 7.0</li> <li>• T: 37.0 °C</li> <li>• t: 90 min</li> <li>• [AFB<sub>1</sub>]: 1.0 <math>\mu\text{g}\cdot\text{mL}^{-1}</math></li> </ul>      | [11]  |

|                                                                  |                           |                                  |             |                                                                                                                                                              |      |
|------------------------------------------------------------------|---------------------------|----------------------------------|-------------|--------------------------------------------------------------------------------------------------------------------------------------------------------------|------|
| Magnetic graphene oxide [10.0 mg]                                | Vegetable oil             | 1.68                             | 86.30       | <ul style="list-style-type: none"> <li>• T: 37.0 °C</li> <li>• t: 40 min</li> <li>• [AFB<sub>1</sub>]: 16.1 µg.L<sup>-1</sup></li> </ul>                     | [12] |
| Magnetic attapulgite [3.0 mg]                                    | Peanut oils               | 0.0529                           | 86.80       | <ul style="list-style-type: none"> <li>• T: 50.0 °C</li> <li>• t: 60 min</li> <li>• [AFB<sub>1</sub>]: 33.8 µg.kg<sup>-1</sup></li> </ul>                    | [13] |
| PDA-PS NFsM <sup>8</sup> [2.5 mg]                                | Edible oil                | 7.73-9.13<br>ng.mg <sup>-1</sup> | 84.80-86.50 | <ul style="list-style-type: none"> <li>• T: 25.0 °C</li> <li>• t: 60 min</li> <li>• [AFB<sub>1</sub>]: 50.0 µg.L<sup>-1</sup></li> </ul>                     | [14] |
| PDA-PS NFsM [2.5 mg]                                             | Liquor                    | 7.73-9.13<br>ng.mg <sup>-1</sup> | 88.10       | <ul style="list-style-type: none"> <li>• T: 25.0 °C</li> <li>• t: 60 min</li> <li>• [AFB<sub>1</sub>]: 50.0 µg.L<sup>-1</sup></li> </ul>                     | [14] |
| PDA-PS NFsM [2.5 mg]                                             | Soy sauce                 | 7.73-9.13<br>ng.mg <sup>-1</sup> | 88.70       | <ul style="list-style-type: none"> <li>• T: 25.0 °C</li> <li>• t: 60 min</li> <li>• [AFB<sub>1</sub>]: 50.0 µg.L<sup>-1</sup></li> </ul>                     | [14] |
| PDA-PS NFsM [2.5 mg]                                             | Rice vinegar              | 7.73-9.13<br>ng.mg <sup>-1</sup> | 85.50       | <ul style="list-style-type: none"> <li>• T: 25.0 °C</li> <li>• t: 60 min</li> <li>• [AFB<sub>1</sub>]: 50.0 µg.L<sup>-1</sup></li> </ul>                     | [14] |
| Pal-Mt <sup>9</sup> [0.01 g]                                     | Water                     | 8.59                             | >80.0       | <ul style="list-style-type: none"> <li>• pH: 6.5</li> <li>• T: 37.0 °C</li> <li>• [AFB<sub>1</sub>]: 100 mg.L<sup>-1</sup></li> </ul>                        | [15] |
| Fe <sub>3</sub> O <sub>4</sub> @Au-MIP <sup>10</sup>             | Non-alcoholic beer        | 8.975                            | 94.47-97.31 | <ul style="list-style-type: none"> <li>• t: 60 min</li> <li>• [AFB<sub>1</sub>]: 1.0 mg.L<sup>-1</sup></li> </ul>                                            | [16] |
| PCL-g-C <sub>3</sub> N <sub>4</sub> /CQDs <sup>11</sup> [0.05 g] | Water                     | -                                | >96.88      | <ul style="list-style-type: none"> <li>• pH: 8.5</li> <li>• T: 45.0 °C</li> <li>• t: 30 min</li> <li>• [AFB<sub>1</sub>]: 0.5 µg.mL<sup>-1</sup></li> </ul>  | [17] |
| MRHB <sup>12</sup>                                               | Peanut oil                | 951.1 µg.g <sup>-1</sup>         | >95.0       | <ul style="list-style-type: none"> <li>• T: 45.0 °C</li> <li>• t: 60 min</li> <li>• [AFB<sub>1</sub>]: 10.0 µg.mL<sup>-1</sup></li> </ul>                    | [18] |
| MCM <sup>13</sup> -41 [1.0 mg.mL <sup>-1</sup> ]                 | Edible oils               | 215.93<br>ng.mg <sup>-1</sup>    | 80.35       | <ul style="list-style-type: none"> <li>• T: 25.0 °C</li> <li>• t: 120 min</li> <li>• [AFB<sub>1</sub>]: 250 ng.mL<sup>-1</sup></li> </ul>                    | [19] |
| NMMS <sup>14</sup> [11.0 mg]                                     | AFB <sub>1</sub> solution | 169.88<br>µg.g <sup>-1</sup>     | 93.43       | <ul style="list-style-type: none"> <li>• pH: 7.0</li> <li>• T: 20.0 °C</li> <li>• t: 120 min</li> <li>• [AFB<sub>1</sub>]: 0.2 µg.mL<sup>-1</sup></li> </ul> | [20] |
| SFHA <sup>15</sup> [10.0 mg]                                     | Water                     | -                                | 99.70       | <ul style="list-style-type: none"> <li>• pH: 2.0-11.0</li> <li>• T: 40.0 °C</li> <li>• [AFB<sub>1</sub>]: 100 µg.kg<sup>-1</sup></li> </ul>                  | [21] |
| Cu-MONT [10.0 mg.mL <sup>-1</sup> ]                              | Water                     | 66.225                           | >93.0       | <ul style="list-style-type: none"> <li>• pH: 3.0</li> <li>• [AFB<sub>1</sub>]: 1.60 mg.L<sup>-1</sup></li> </ul>                                             | [22] |
| FM@GO@Fe <sub>3</sub> O <sub>4</sub> <sup>16</sup> [15.0 mg]     | Vegetable oil             | 0.3533<br>µg.mg <sup>-1</sup>    | >70.0       | <ul style="list-style-type: none"> <li>• T: 50.0 °C</li> <li>• t: 600 min</li> <li>• [AFB<sub>1</sub>]: 50.0 µg.kg<sup>-1</sup></li> </ul>                   | [23] |
| GT-Fe-NPs <sup>17</sup> [1.0 mg.mL <sup>-1</sup> ]               | Water                     | 131-139<br>ng.mg <sup>-1</sup>   | 85.0-90.0   | <ul style="list-style-type: none"> <li>• pH: 7.0</li> <li>• T: 37.0 °C</li> <li>• t: 45 min</li> <li>• [AFB<sub>1</sub>]: 100 ng.mL<sup>-1</sup></li> </ul>  | [24] |

|                                          |            |       |       |                                                                                                                                                             |                         |
|------------------------------------------|------------|-------|-------|-------------------------------------------------------------------------------------------------------------------------------------------------------------|-------------------------|
| (8:1) Al-Fe PILC <sup>18</sup> [40.0 mg] | Water      | 0.67  | -     | <ul style="list-style-type: none"> <li>• pH: 2.0</li> <li>• T: 37.0 °C</li> <li>• t: 60 min</li> <li>• [AFB<sub>1</sub>]: 4.0 µg.mL<sup>-1</sup></li> </ul> | [25]                    |
| DC/CFOS [2,5 mg/L]                       | Water      | 3.449 | 97.40 | <ul style="list-style-type: none"> <li>• pH:</li> <li>• T: 25°C</li> <li>• t: 100 min</li> <li>• [AFB<sub>1</sub>]: 50.0 µg.mL<sup>-1</sup></li> </ul>      | <b><i>This work</i></b> |
| DC/CFOS [2,5 mg/L]                       | Edible oil | 3.127 | 92.60 | <ul style="list-style-type: none"> <li>• pH: 2.0</li> <li>• T: 25 °C</li> <li>• t: 110 min</li> <li>• [AFB<sub>1</sub>]: 2.50 µg.mL<sup>-1</sup></li> </ul> | <b><i>This work</i></b> |
| DC/CFOS [2,5 mg/L]                       | Corn oil   | 3.106 | 91.70 | <ul style="list-style-type: none"> <li>• pH: 2.0</li> <li>• T: 25 °C</li> <li>• t: 110 min</li> <li>• [AFB<sub>1</sub>]: 2.50 µg.mL<sup>-1</sup></li> </ul> | <b><i>This work</i></b> |

<sup>1</sup> Organo-montmorillonites modified by binary surfactant mixtures.

<sup>2</sup> Octylphenol polyoxyethylene ether.

<sup>3</sup> Polydopamine and polyethyleneimine.

<sup>4</sup> Magnetic soybeans dreg-based biochar.

<sup>5</sup> Magnetic mesoporous silica.

<sup>6</sup> Functionalized nanoflower-like hydroxyl magnesium silicate.

<sup>7</sup> Copper silicate composites with novel duster-like hollow mesoporous structure.

<sup>8</sup> Polydopamine modified nanofibers membrane.

<sup>9</sup> Polygorskite-montmorillonite.

<sup>10</sup> Molecular imprinted polymer coupled with Fe<sub>3</sub>O<sub>4</sub>-Au nanocomposite.

<sup>11</sup> Polycaprolactone membranes anchored to g-C<sub>3</sub>N<sub>4</sub>.

<sup>12</sup> Magnetic rice husk-based biochar.

<sup>13</sup> Rice husk-based mesoporous silica.

<sup>14</sup> Amino-grafted magnetic mesoporous silica.

<sup>15</sup> Sodium-free humic acid.

<sup>16</sup> A hierarchical fungal mycelia@graphene oxide@Fe<sub>3</sub>O<sub>4</sub>.

<sup>17</sup> Fe nanoparticles using green tea.

<sup>18</sup> Aluminum-iron-pillared montmorillonite.

## References

- 1 F. Ma, X. Cai, J. Mao, L. Yu and P. Li, *J. Hazard. Mater.*, 2021, **412**, 125170.
- 2 Z. Sun, C. Lian, C. Li and S. Zheng, *J. colloid interface sci.*, 2020, **565**, 11-22.
- 3 G. Wang, C. Lian, Y. Xi, Z. Sun and S. Zheng, *J. colloid interface sci.*, 2018, **518**, 48-56.
- 4 S. Li, J. Luo, J. Fan, X. Chen and Y. Wan, *Sep. Purif. Technol.*, 2018, **199**, 311-319.
- 5 Z. Ying, T. Zhang, H. Li and X. Liu, *Food Chem.*, 2023, **409**, 135321.
- 6 Y. Li, R. Wang, Z. Chen, X. Zhao, X. Luo, L. Wang, Y. Li, and F. Teng, *PLoS One*, 2020, **15**, e0238837.
- 7 Z. Sun, D. Huang, X. Duan, W. Hong and J. Liang, *J. Hazard. Mater.*, 2020, **387**, 121792.
- 8 Y. Li, K. Nie, Q. Tang, G. Tian and J. Liang, *Microporous Mesoporous Mater.*, 2022, **346**, 112317.
- 9 J. M. Fernandes, T. Calado, A. Guimarães, M. A. M. Rodrigues and L. Abrunhosa, *Mycotoxin Res.*, 2019, **35**, 243-252.
- 10 Z. H. Shar, M. T. Fletcher, G. A. Sumbal, S. T. H. Sherazi, C. Giles, M. I. Bhangar, S. M. Nizamani, *Food Addit. Contam. Part A*, 2016, **33**, 849-860.
- 11 S. Adunphatcharaphon, A. Petchkongkaew, D. Greco, V. D'Ascanio, W. Visessanguan and G. Avantiato, *Toxins*, 2020, **12**, 108.
- 12 J. Ji and W. Xie, *J. Hazard. Mater.*, 2020, **381**, 120915.
- 13 J. Ji and W. Xie, *Food Chem.*, 2021, **339**, 128072.
- 14 H. Dai, S. Liang, D. Shan, Q. Zhang, J. Li, Q. Xu and C. Wang, *Food Chem.*, 2022, **380**, 132176.
- 15 Y. Zhao, X. Han, N. Zhang, J. Meng, H. Zhang and J. Liang, *Langmuir*, 2023, **39**, 2797-2807.
- 16 M. Pezeshkpur, F. Tadayon and M. R. Sohrabi, *Chem. Select*, 2023, **8**, e202300112.
- 17 L. Yao, C. Sun, H. Lin, G. Li, Z. Lian, R. Song, S. Zhuang and D. Zhang, *Biomolecules*, 2023, **13**, 550.
- 18 P. Li, S. Wang, B. Lv, M. Zhang, C. Xing, X. Sun and Y. Fang, *Food Control*, 2023, **152**, 109883.
- 19 Y. N. Li, R. Wang, X. Luo, Z. Chen, L. Wang, Y. Zhou, W. Liu, M. Cheng and C. Zhang, *Toxins*, 2022, **14**, 87.
- 20 Y. Zhou, R. Wang, Z. Chen, X. Luo, L. Wang, X. Zhao, C. Zhang and P. Yu, *Food Chem.*, 2022, **389**, 132987.
- 21 J. A. Maguey-González, M. D. J. Nava-Ramírez, S. Gómez-Rosales, M. D. L. Ángeles, B. Solís-Cruz, D. Hernández-Patlán, R. Merino-Guzmán, X. Hernández-Velasco, J. D. D. Figueroa-Cárdenas, A. Vázquez-Durán and B. M. Hargis, *Toxins*, 2023, **15**, 83.
- 22 A. Daković, S. Matijašević, G. E. Rottinghaus, D. R. Ledoux, P. Butkeraitis and Z. Sekulić, *Colloids Surf. B*, 2008, **66**, 20-25.
- 23 F. Ma, Q. Guo, Z. Zhang, X. Ding, L. Zhang, P. Li and L. Yu, *Food Chem.*, 2023, **428**, 136779.

24 M. A. Asghar, E. Zahir, S. M. Shahid, M. N. Khan, M. A. Asghar, J. Iqbal and G. Walker, *Lwt*, 2018, **90**, 98-107.

25 L. Zeng, S. Wang, X. Peng, J. Geng, C. Chen and M. Li, *Appl. Clay Sci.*, 2013, **83**, 231-237.
